# Supplementary material for: Chinese-Language Montreal Cognitive Assessment for Cantonese or Mandarin Speakers: Age, Education, and Gender Effects
Source: Hindawi journal article supplement (doi:10.1155/2012/204623), 2012-01-01
Supplement: f1 [file 204623.f1.pdf]

中文“蒙特利尔认知评估” 洛杉矶版 CHES ID \_\_\_\_\_

出生日期: \_\_\_\_ / \_\_\_\_ / 19\_\_ (月/日/年) 性别: 女 男 教育水平: \_\_\_\_ 年

受测者惯用语: \_\_\_\_ 施测用语: \_\_ 1- 广东话, 2- 普通话, 3- 台湾话, 4- 英语, 5- 其他:

施测日期: \_\_\_\_ / \_\_\_\_ / 201\_\_ (月/日/年) 施测者: \_\_\_\_ (拒绝回答的问题请标 99)

|                                                                                                                                                                                                                                                                                                                                                                                                                |                                                                                                                                                                                                                                                                                                                 |                        |    |    |    |    |     |     |  |  |  |  |      |     |  |  |  |  |      |              |  |  |  |  |  |              |
|----------------------------------------------------------------------------------------------------------------------------------------------------------------------------------------------------------------------------------------------------------------------------------------------------------------------------------------------------------------------------------------------------------------|-----------------------------------------------------------------------------------------------------------------------------------------------------------------------------------------------------------------------------------------------------------------------------------------------------------------|------------------------|----|----|----|----|-----|-----|--|--|--|--|------|-----|--|--|--|--|------|--------------|--|--|--|--|--|--------------|
| <p><b>视空间与执行功能</b></p>                                                                                                                                                                                                                                                                                                                                                                                         | <p><b>画时钟示时 (11点10分)</b></p> <p>轮廓      数字      指针</p>                                                                                                                                                                                                                                                          | <p>得分</p> <p>___/5</p> |    |    |    |    |     |     |  |  |  |  |      |     |  |  |  |  |      |              |  |  |  |  |  |              |
| <p><b>命名</b></p> <p>[      ]      [      ]      [      ]</p>                                                                                                                                                                                                                                                                                                                                                   |                                                                                                                                                                                                                                                                                                                 |                        |    |    |    |    |     |     |  |  |  |  |      |     |  |  |  |  |      |              |  |  |  |  |  |              |
| <p><b>记忆</b></p> <p>每秒1词, 立刻回忆, 共2次。答对的标 '1', 否则标 '0'。告知将再测。</p>                                                                                                                                                                                                                                                                                                                                               | <table border="1" style="margin-left: auto; margin-right: auto;"> <tr> <td></td> <td>头发</td> <td>茶杯</td> <td>教堂</td> <td>菊花</td> <td>红色</td> </tr> <tr> <td>第一次</td> <td></td> <td></td> <td></td> <td></td> <td></td> </tr> <tr> <td>第二次</td> <td></td> <td></td> <td></td> <td></td> <td></td> </tr> </table> |                        | 头发 | 茶杯 | 教堂 | 菊花 | 红色  | 第一次 |  |  |  |  |      | 第二次 |  |  |  |  |      | <p>___/3</p> |  |  |  |  |  |              |
|                                                                                                                                                                                                                                                                                                                                                                                                                | 头发                                                                                                                                                                                                                                                                                                              | 茶杯                     | 教堂 | 菊花 | 红色 |    |     |     |  |  |  |  |      |     |  |  |  |  |      |              |  |  |  |  |  |              |
| 第一次                                                                                                                                                                                                                                                                                                                                                                                                            |                                                                                                                                                                                                                                                                                                                 |                        |    |    |    |    |     |     |  |  |  |  |      |     |  |  |  |  |      |              |  |  |  |  |  |              |
| 第二次                                                                                                                                                                                                                                                                                                                                                                                                            |                                                                                                                                                                                                                                                                                                                 |                        |    |    |    |    |     |     |  |  |  |  |      |     |  |  |  |  |      |              |  |  |  |  |  |              |
| <p><b>注意</b></p> <p>每秒1字。记下回答。</p> <p>(顺背): 2-1-8-5-4      答: 2-1-8-5-4      [      ]<br/>             (倒背): 7-4-2      答: 2-4-7      [      ]</p>                                                                                                                                                                                                                                                             |                                                                                                                                                                                                                                                                                                                 | <p>___/2</p>           |    |    |    |    |     |     |  |  |  |  |      |     |  |  |  |  |      |              |  |  |  |  |  |              |
| <p>每秒1字。听到敲桌时, 在相应的数字上画画。</p> <p>5-2-1-3-9-4-1-1-8-0-6-2-1-5-1-9-4-5-1-1-1-4-1-9-0-5-1-1-2</p>                                                                                                                                                                                                                                                                                                                 |                                                                                                                                                                                                                                                                                                                 | <p>___/1</p>           |    |    |    |    |     |     |  |  |  |  |      |     |  |  |  |  |      |              |  |  |  |  |  |              |
| <p>100 连续减7, 记下答案 (最多5个): [      ] [      ] [      ] [      ] [      ]</p>                                                                                                                                                                                                                                                                                                                                     |                                                                                                                                                                                                                                                                                                                 | <p>___/3</p>           |    |    |    |    |     |     |  |  |  |  |      |     |  |  |  |  |      |              |  |  |  |  |  |              |
| <p><b>语言</b></p> <p>重复(全对的标 '1', 否则标 '0'): 我只知道 今天 该小张来帮忙 (6秒)      [      ]<br/>             狗在房间的时候, 猫总是躲在沙发下面 (6秒)      [      ]</p>                                                                                                                                                                                                                                                                        |                                                                                                                                                                                                                                                                                                                 | <p>___/2</p>           |    |    |    |    |     |     |  |  |  |  |      |     |  |  |  |  |      |              |  |  |  |  |  |              |
| <p>四支脚动物的名字 : 30秒 30秒:      [      ]   [      ]</p>                                                                                                                                                                                                                                                                                                                                                            |                                                                                                                                                                                                                                                                                                                 | <p>___/1</p>           |    |    |    |    |     |     |  |  |  |  |      |     |  |  |  |  |      |              |  |  |  |  |  |              |
| <p><b>抽象</b></p> <p>香蕉-桔子=水果      火车-自行车/ 脚踏车/ 单车 [      ]      手表-尺 [      ]</p>                                                                                                                                                                                                                                                                                                                              |                                                                                                                                                                                                                                                                                                                 | <p>___/2</p>           |    |    |    |    |     |     |  |  |  |  |      |     |  |  |  |  |      |              |  |  |  |  |  |              |
| <p><b>延迟回忆</b></p> <table border="1" style="margin-left: auto; margin-right: auto;"> <tr> <td></td> <td>头发</td> <td>茶杯</td> <td>教堂</td> <td>菊花</td> <td>红色</td> </tr> <tr> <td>未提示</td> <td></td> <td></td> <td></td> <td></td> <td></td> </tr> <tr> <td>类别提示</td> <td></td> <td></td> <td></td> <td></td> <td></td> </tr> <tr> <td>三项选一</td> <td></td> <td></td> <td></td> <td></td> <td></td> </tr> </table> |                                                                                                                                                                                                                                                                                                                 | 头发                     | 茶杯 | 教堂 | 菊花 | 红色 | 未提示 |     |  |  |  |  | 类别提示 |     |  |  |  |  | 三项选一 |              |  |  |  |  |  | <p>___/5</p> |
|                                                                                                                                                                                                                                                                                                                                                                                                                | 头发                                                                                                                                                                                                                                                                                                              | 茶杯                     | 教堂 | 菊花 | 红色 |    |     |     |  |  |  |  |      |     |  |  |  |  |      |              |  |  |  |  |  |              |
| 未提示                                                                                                                                                                                                                                                                                                                                                                                                            |                                                                                                                                                                                                                                                                                                                 |                        |    |    |    |    |     |     |  |  |  |  |      |     |  |  |  |  |      |              |  |  |  |  |  |              |
| 类别提示                                                                                                                                                                                                                                                                                                                                                                                                           |                                                                                                                                                                                                                                                                                                                 |                        |    |    |    |    |     |     |  |  |  |  |      |     |  |  |  |  |      |              |  |  |  |  |  |              |
| 三项选一                                                                                                                                                                                                                                                                                                                                                                                                           |                                                                                                                                                                                                                                                                                                                 |                        |    |    |    |    |     |     |  |  |  |  |      |     |  |  |  |  |      |              |  |  |  |  |  |              |
| <p><b>定句</b></p> <p>年 [      ]      月 [      ]      日 [      ]      星期几 [      ]      街 [      ]      城市 [      ]</p>                                                                                                                                                                                                                                                                                          |                                                                                                                                                                                                                                                                                                                 | <p>___/6</p>           |    |    |    |    |     |     |  |  |  |  |      |     |  |  |  |  |      |              |  |  |  |  |  |              |

分数极可能无效, 详见背面: \_\_\_\_\_

Figure1. The MoCA-ChLA Record Form
